# Supplementary material for: Anion effects on the cytotoxicity of ionic liquids
Source: Royal Society of Chemistry journal article supplement (doi:10.1039/b602161a), 2006-01-01
Supplement: b602161a.pdf [file b602161a.pdf]

# **Electronic Supplementary Information to "Anion effects on the cytotoxicity of ionic liquids"**

Stefan Stolte and Johannes Ranke

June 13, 2006

Table 1: All fitted EC<sub>50</sub> values and their confidence intervals (conf). The definitions of mtype, sigma, b, and c are given in the documentation of the R package drfit: <http://cran.r-project.org/src/contrib/Descriptions/drfit.html>

|                                                                                        | mtype    | EC <sub>50</sub> | log EC <sub>50</sub> | conf  | unit | sigma | b     | c        |
|----------------------------------------------------------------------------------------|----------|------------------|----------------------|-------|------|-------|-------|----------|
| Na BF <sub>4</sub>                                                                     | inactive | >4000            |                      |       | μM   |       |       |          |
| Na (CN) <sub>2</sub> N                                                                 | linlogit | 14000            | 4.15                 | 0.09  | μM   | 0.11  | 0.24  | -2.8e-05 |
| Na SbF <sub>6</sub>                                                                    | linlogit | 200              | 2.31                 | 0.047 | μM   | 0.086 | 1.4   | -0.00016 |
| Na SCN                                                                                 | inactive | >20000           |                      |       | μM   |       |       |          |
| Na HSO <sub>4</sub>                                                                    | linlogit | 7800             | 3.89                 | 0.026 | μM   | 0.049 | 0.34  | -4.9e-05 |
| Na CH <sub>3</sub> OSO <sub>3</sub>                                                    | inactive | >10000           |                      |       | μM   |       |       |          |
| Na C <sub>8</sub> H <sub>17</sub> OSO <sub>3</sub>                                     | linlogit | 3000             | 3.48                 | 0.077 | μM   | 0.23  | 2.5   | 0.00094  |
| Na CH <sub>3</sub> SO <sub>3</sub>                                                     | inactive | >20000           |                      |       | μM   |       |       |          |
| Na CF <sub>3</sub> SO <sub>3</sub>                                                     | inactive | >10000           |                      |       | μM   |       |       |          |
| Na Tos                                                                                 | linlogit | 17000            | 4.22                 | 0.063 | μM   | 0.099 | 1.2   | -4.1e-05 |
| Na F                                                                                   | linlogit | 1200             | 3.07                 | 0.034 | μM   | 0.1   | 0.57  | -0.00049 |
| Na Cl                                                                                  | inactive | >5000            |                      |       | μM   |       |       |          |
| Na Br                                                                                  | inactive | >5000            |                      |       | μM   |       |       |          |
| Na I                                                                                   | inactive | >5000            |                      |       | μM   |       |       |          |
| Li BBDB                                                                                | linlogit | 13               | 1.13                 | 0.11  | μM   | 0.15  | 1.1   | -0.0023  |
| Li BOB                                                                                 | logit    | 760              | 2.88                 | 0.071 | μM   | 0.11  | 0.42  |          |
| Li N(SO <sub>2</sub> CF <sub>3</sub> ) <sub>2</sub>                                    | linlogit | 2200             | 3.33                 | 0.11  | μM   | 0.16  | 1     | -5.2e-05 |
| Li Cl                                                                                  | linlogit | >5000            |                      |       | μM   |       |       |          |
| C <sub>2</sub> MIM BF <sub>4</sub>                                                     | linlogit | 3400             | 3.53                 | 0.075 | μM   | 0.13  | 0.43  | -7.9e-05 |
| C <sub>2</sub> MIM BBDB                                                                | linlogit | 10               | 1.00                 | 0.06  | μM   | 0.093 | 1.1   | -0.0082  |
| C <sub>2</sub> MIM BOB                                                                 | linlogit | 860              | 2.93                 | 0.049 | μM   | 0.14  | 2.9   | -0.00037 |
| C <sub>2</sub> MIM PF <sub>6</sub>                                                     | logit    | 8400             | 3.92                 | 0.041 | μM   | 0.13  | 0.086 |          |
| C <sub>2</sub> MIM (C <sub>2</sub> F <sub>5</sub> ) <sub>3</sub> PF <sub>3</sub>       | no fit   | <100             |                      |       | μM   |       |       |          |
| C <sub>2</sub> MIM (C <sub>2</sub> F <sub>5</sub> ) <sub>2</sub> P(O)O                 | linlogit | 680              | 2.83                 | 0.065 | μM   | 0.22  | 3.4   | 0.00054  |
| C <sub>2</sub> MIM C <sub>2</sub> H <sub>5</sub> OSO <sub>3</sub>                      | linlogit | 8500             | 3.93                 | 0.059 | μM   | 0.16  | 5.9   | -3.5e-05 |
| C <sub>2</sub> MIM Cl                                                                  | linlogit | 7200             | 3.86                 | 0.048 | μM   | 0.12  | -0.11 | -6.2e-05 |
| C <sub>4</sub> MIM BF <sub>4</sub>                                                     | linlogit | 1700             | 3.22                 | 0.025 | μM   | 0.15  | 0.55  | -0.00038 |
| C <sub>4</sub> MIM (CN) <sub>2</sub> N                                                 | linlogit | 1400             | 3.15                 | 0.071 | μM   | 0.15  | 2.7   | 0.00061  |
| C <sub>4</sub> MIM N(CF <sub>3</sub> ) <sub>2</sub>                                    | linlogit | 150              | 2.19                 | 0.082 | μM   | 0.21  | 2.2   | -0.00038 |
| C <sub>4</sub> MIM N(SO <sub>2</sub> CF <sub>3</sub> ) <sub>2</sub>                    | linlogit | 480              | 2.68                 | 0.036 | μM   | 0.19  | 3.9   | 0.0019   |
| C <sub>4</sub> MIM PF <sub>6</sub>                                                     | linlogit | 1300             | 3.10                 | 0.028 | μM   | 0.089 | 3.1   | 1.7e-05  |
| C <sub>4</sub> MIM C <sub>2</sub> F <sub>5</sub> ) <sub>3</sub> PF <sub>3</sub>        | no fit   | <100             |                      |       | μM   |       |       |          |
| C <sub>4</sub> MIM SbF <sub>6</sub>                                                    | probit   | 180              | 2.26                 | 0.035 | μM   | 0.015 | 0.27  |          |
| C <sub>4</sub> MIM SCN                                                                 | linlogit | 2600             | 3.42                 | 0.049 | μM   | 0.097 | 1.8   | -1.2e-05 |
| C <sub>4</sub> MIM HSO <sub>4</sub>                                                    | linlogit | 1900             | 3.29                 | 0.042 | μM   | 0.079 | 1.7   | 4.3e-05  |
| C <sub>4</sub> MIM CH <sub>3</sub> OSO <sub>3</sub>                                    | logit    | 1700             | 3.24                 | 0.11  | μM   | 0.21  | 0.29  |          |
| C <sub>4</sub> MIM C <sub>8</sub> H <sub>17</sub> OSO <sub>3</sub>                     | linlogit | 1700             | 3.23                 | 0.052 | μM   | 0.2   | 4.6   | 0.0015   |
| C <sub>4</sub> MIM H <sub>3</sub> CO(CH <sub>2</sub> ) <sub>2</sub> OSO <sub>3</sub>   | linlogit | 1100             | 3.05                 | 0.025 | μM   | 0.17  | 22    | 5.6e-06  |
| C <sub>4</sub> MIM H <sub>3</sub> C(OCH <sub>2</sub> CH <sub>2</sub> )OSO <sub>3</sub> | linlogit | 1400             | 3.16                 | 0.081 | μM   | 0.19  | 2.4   | 0.00054  |
| C <sub>4</sub> MIM CH <sub>3</sub> SO <sub>3</sub>                                     | linlogit | 3200             | 3.51                 | 0.099 | μM   | 0.16  | 1.5   | 0.00013  |
| C <sub>4</sub> MIM CF <sub>3</sub> SO <sub>3</sub>                                     | linlogit | 1000             | 3.02                 | 0.028 | μM   | 0.12  | 3.3   | 0.00041  |
| C <sub>4</sub> MIM Tos                                                                 | linlogit | 1900             | 3.29                 | 0.077 | μM   | 0.21  | 2.4   | 0.00081  |
| C <sub>4</sub> MIM Cl                                                                  | linlogit | 3600             | 3.55                 | 0.071 | μM   | 0.17  | 1.9   | 0.00068  |
| C <sub>4</sub> MIM Br                                                                  | linlogit | 2700             | 3.43                 | 0.079 | μM   | 0.12  | 2     | 0.00055  |
| C <sub>4</sub> MIM I                                                                   | linlogit | 3000             | 3.48                 | 0.049 | μM   | 0.097 | 1.8   | 7.2e-05  |
| C <sub>4</sub> MIM Co(CO) <sub>4</sub>                                                 | linlogit | 280              | 2.44                 | 0.053 | μM   | 0.14  | 3.6   | -0.00094 |
| C <sub>6</sub> MIM BF <sub>4</sub>                                                     | linlogit | 960              | 2.98                 | 0.11  | μM   | 0.3   | 2     | 0.0043   |
| C <sub>6</sub> MIM (CF <sub>3</sub> SO <sub>2</sub> ) <sub>3</sub> C                   | linlogit | 3300             | 3.51                 | 0.087 | μM   | 0.19  | 2.6   | -0.00018 |
| C <sub>6</sub> MIM N(SO <sub>2</sub> CF <sub>3</sub> ) <sub>2</sub>                    | linlogit | 180              | 2.24                 | 0.062 | μM   | 0.29  | 2.3   | 0.0093   |
| C <sub>6</sub> MIM PF <sub>6</sub>                                                     | linlogit | 810              | 2.91                 | 0.19  | μM   | 0.42  | 1.7   | 0.0086   |
| C <sub>6</sub> MIM (C <sub>2</sub> F <sub>5</sub> ) <sub>3</sub> PF <sub>3</sub>       | no fit   | <100             |                      |       | μM   |       |       |          |
| C <sub>6</sub> MIM (C <sub>3</sub> F <sub>7</sub> ) <sub>3</sub> PF <sub>3</sub>       | no fit   | <50              |                      |       | μM   |       |       |          |
| C <sub>6</sub> MIM Cl                                                                  | linlogit | 720              | 2.86                 | 0.098 | μM   | 0.37  | 2.1   | 0.0037   |
| C <sub>8</sub> MIM Cl                                                                  | linlogit | 100              | 2.01                 | 0.055 | μM   | 0.19  | 2.1   | 0.06290  |
| C <sub>8</sub> MIM N(SO <sub>2</sub> CF <sub>3</sub> ) <sub>2</sub>                    | probit   | 38               | 1.58                 | 0.11  | μM   | 0.21  | 0.56  |          |
| C <sub>10</sub> MIM Cl                                                                 | linlogit | 22               | 1.34                 | 0.042 | μM   | 0.11  | 2.1   | 0.07690  |
